# Supplementary material for: Multisignaling detection ofcyanide anions based on an iridium(iii) complex: remarkable enhancement of sensitivity by coordination effect
Source: Royal Society of Chemistry journal article supplement (doi:10.1039/b9nj00442d), 2009-11-20
Supplement: b9nj00442d.pdf [file b9nj00442d.pdf]

# Multisignaling detection of cyanide anions based on an iridium(III) complex: remarkable enhancement of sensitivity by coordination effect

Bin Lou, Zhu-Qi Chen, Zu-Qiang Bian,\* Chun-Hui Huang

Beijing National Laboratory for Molecular Sciences, State Key Laboratory of Rare Earth  
Materials Chemistry and Applications, College of Chemistry and Molecular Engineering,  
Peking University, Beijing, 100871, China

## Support Information.

### 1.- NOESY spectra of 1 (400MHz, CDCl<sub>3</sub>).

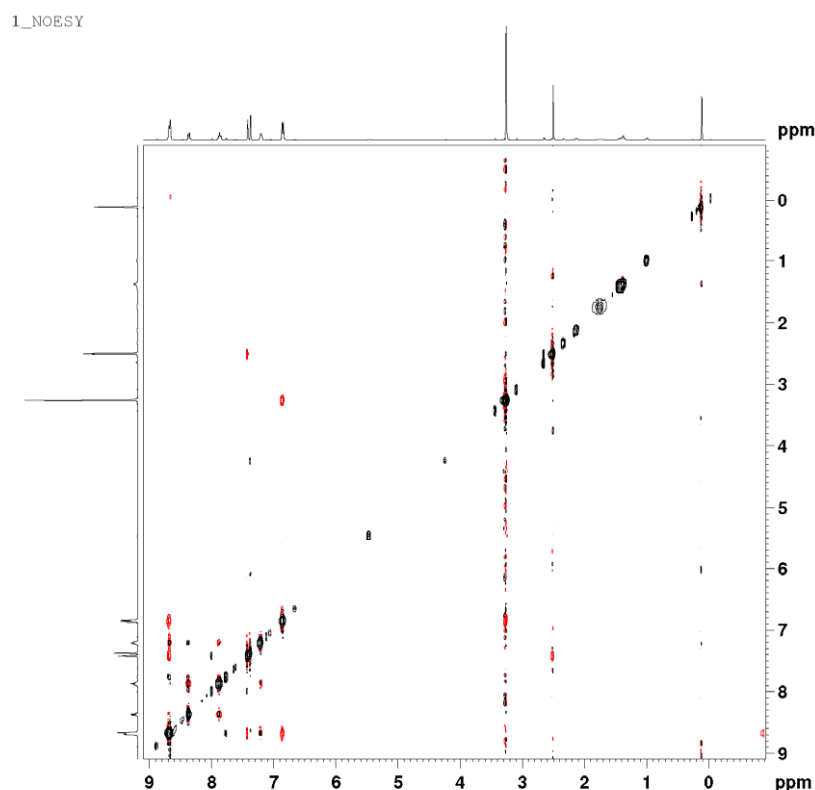

Figure S1. NOESY spectra of 1 (400MHz, CDCl<sub>3</sub>).

### 2.-ESI-MS changes produced via the addition of cyanide anion in mixture of CDCl<sub>3</sub> and CH<sub>3</sub>CN

### Peking University Mass Spectrometry Analysis Report

#### Analysis Info

Analysis Name 90167\_Pos.d  
Sample 4  
Comment

Acquisition Date 2/18/2009 11:51:01 AM  
Instrument Bruker micrOTOF-Q  
Operator Peking University

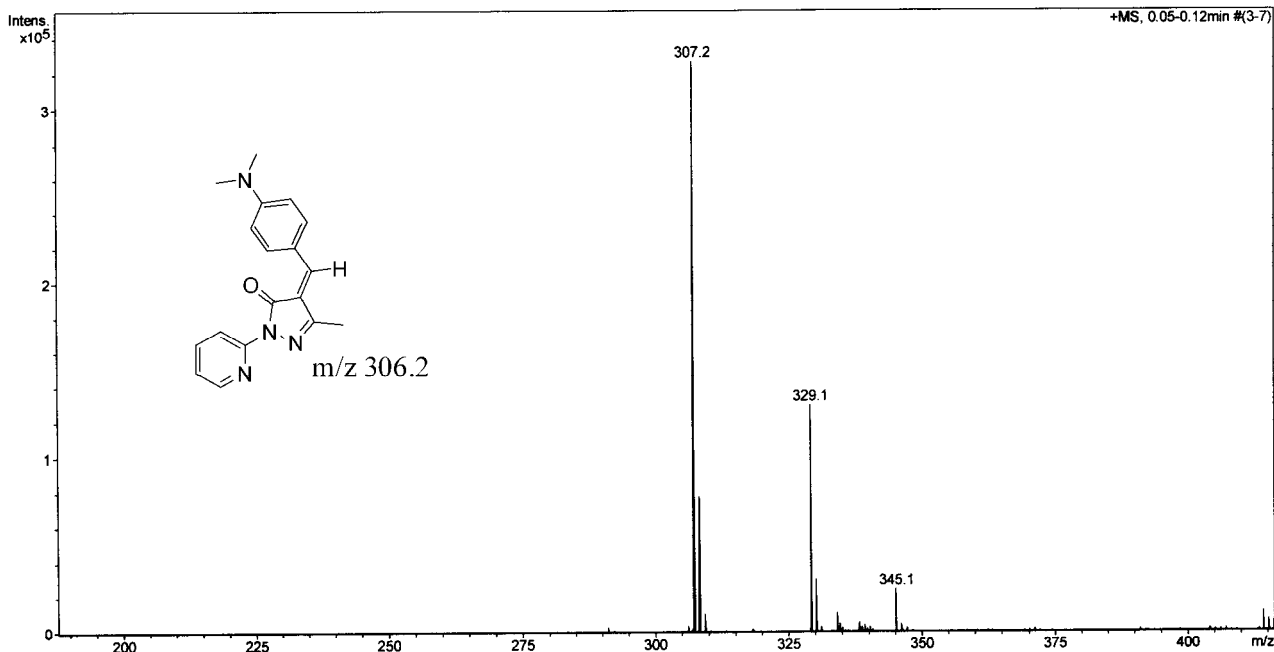

### Peking University Mass Spectrometry Analysis Report

#### Analysis Info

Analysis Name 90169\_Neg.d  
Sample 2  
Comment

Acquisition Date 2/18/2009 10:52:19 AM  
Instrument Bruker micrOTOF-Q  
Operator Peking University

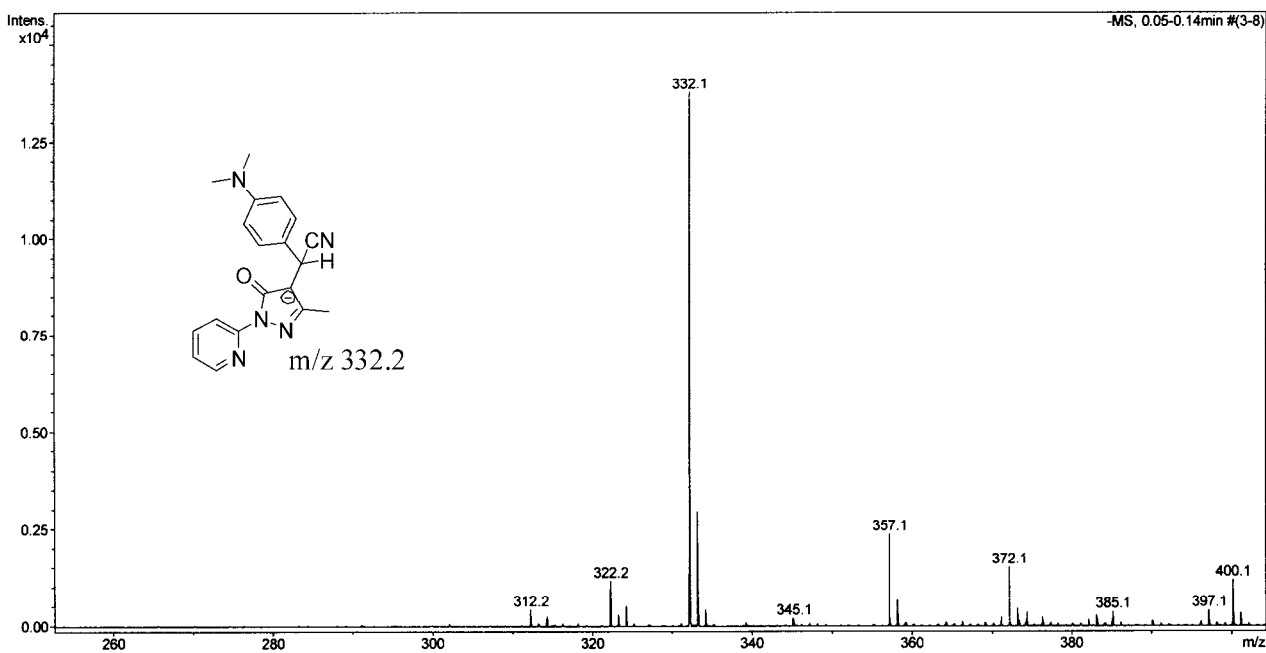

### Peking University Mass Spectrometry Analysis Report

#### Analysis Info

Analysis Name 90168\_Pos.d  
Sample 3  
Comment

Acquisition Date 2/18/2009 11:53:05 AM  
Instrument Bruker micrOTOF-Q  
Operator Peking University

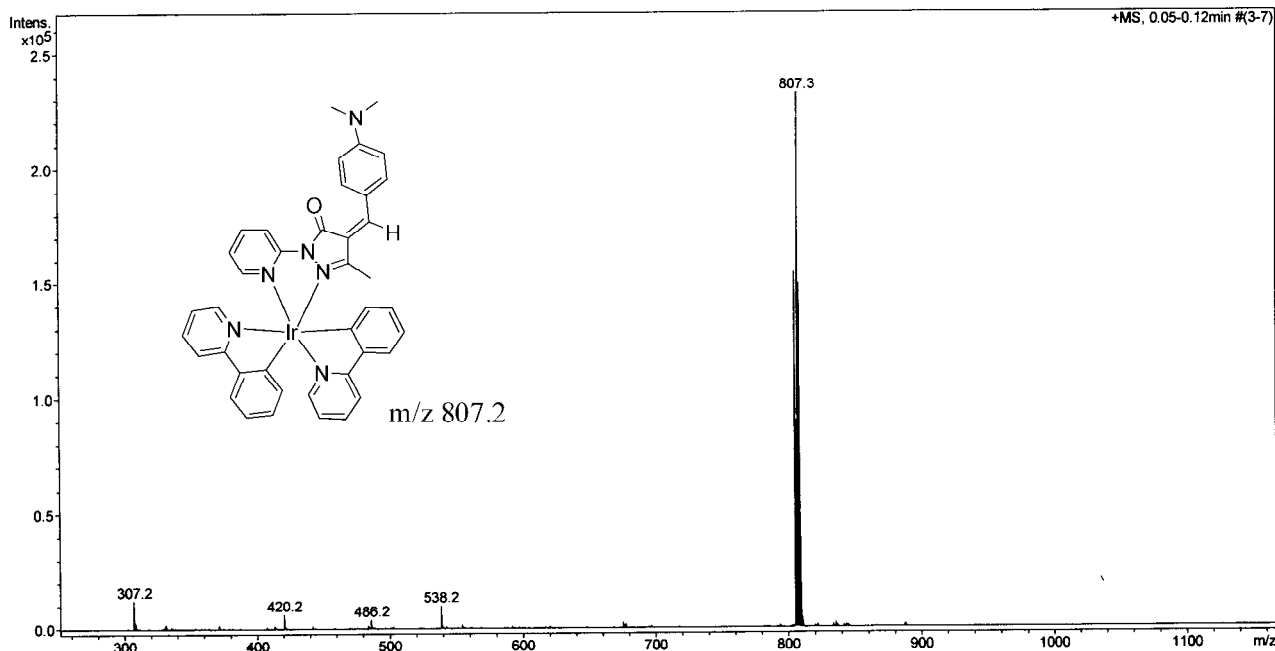

Bruker Compass DataAnalysis 4.0

printed: 2/18/2009 5:32:31 AM

Page 1 of 1

### Peking University Mass Spectrometry Analysis Report

#### Analysis Info

Analysis Name 90170\_Pos.d  
Sample 1  
Comment

Acquisition Date 2/18/2009 11:55:36 AM  
Instrument Bruker micrOTOF-Q  
Operator Peking University

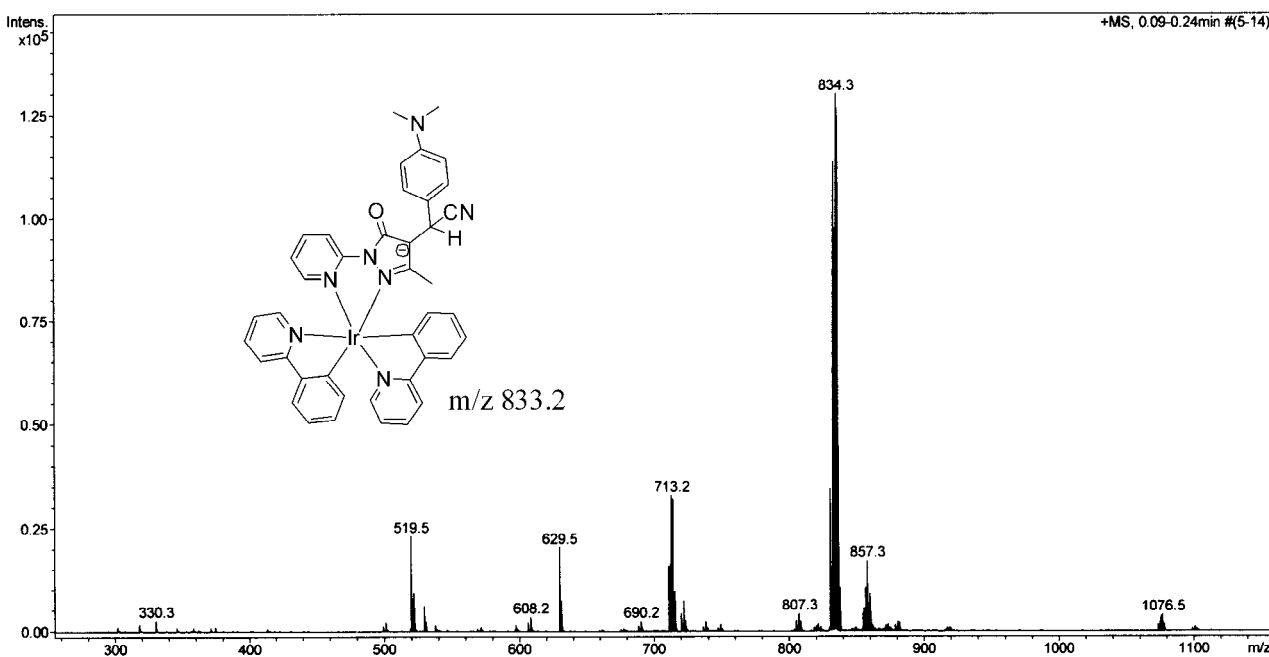

Bruker Compass DataAnalysis 4.0

printed: 2/18/2009 5:35:45 AM

Page 1 of 1

Figure S2. ESI-MS changes of **1** and **2** produced via the addition of cyanide anion in the mixture of

### 3.- UV-Vis spectral changes of the probe 1 and 2 seen upon the addition of various anions

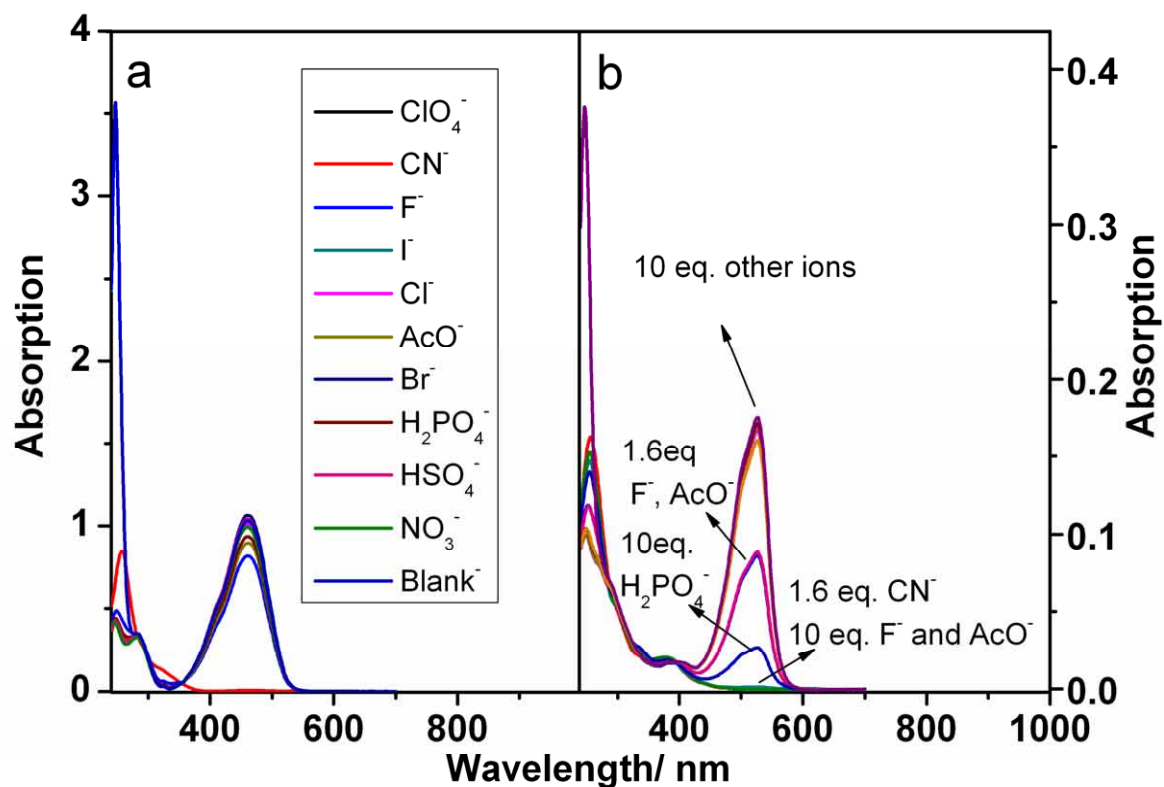

**Figure S3.** a. UV-Vis spectral change of the probe **1** seen upon the addition of 12 equiv. of various anions (top, 20 μM) and b. **2** (bottom, 2.0 μM) in CH<sub>3</sub>CN.
